# Supplementary material for: Ultra-stretchable graphene aerogels at ultralow temperatures
Source: Royal Society of Chemistry journal article supplement (doi:10.1039/d3mh00014a), 2023-01-01
Supplement: d3mh00014a5.pdf [file d3mh00014a5.pdf]

## **Ultra-stretchable graphene aerogels at ultralow temperatures**

*Guohui Yang<sup>‡</sup>, Xiaofang Zhang<sup>‡</sup>, Ruijia Wang, Xu Liu, Jianming Zhang, Lu Zong\*, and Hongsheng Yang\**

Key Laboratory of Rubber-Plastics, Ministry of Education/Shandong Provincial Key Laboratory of Rubber-Plastics, Qingdao University of Science & Technology, Qingdao, 266042, China

Corresponding authors: L. Zong and H. Yang

E-mail: [zonglu@qust.edu.cn](mailto:zonglu@qust.edu.cn) (L. Zong); [yhs@qust.edu.cn](mailto:yhs@qust.edu.cn) (H. Yang)

<sup>‡</sup>The authors equally contribute to this manuscript.

## Supporting Figures

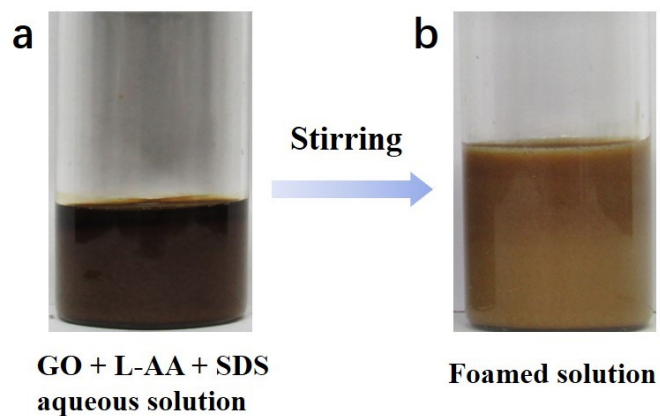

**Fig. S1.** The foaming process of GO aqueous solution. (a) GO aqueous solution with L-ascorbic acid (L-AA) and sodium dodecyl sulfate (SDS). (b) Foamed GO solution with a lot of microbubbles prepared from (a) after stirring.

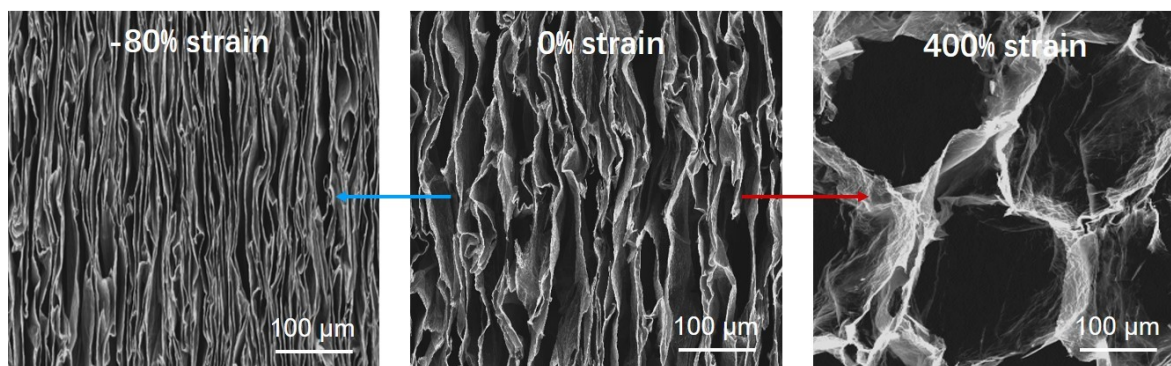

**Fig. S2.** SEM images of CAGA at 0% strain, -80% strain, 400% strain, respectively.

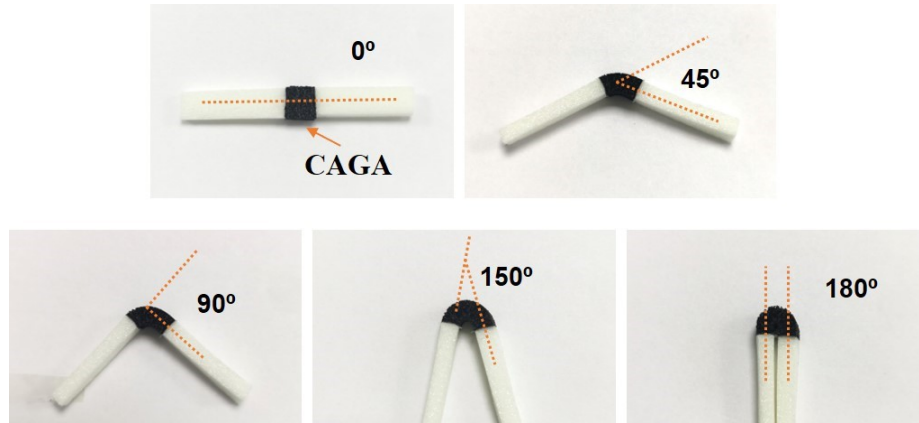

**Fig. S3.** The bending process of the CAGA with different bending angles.

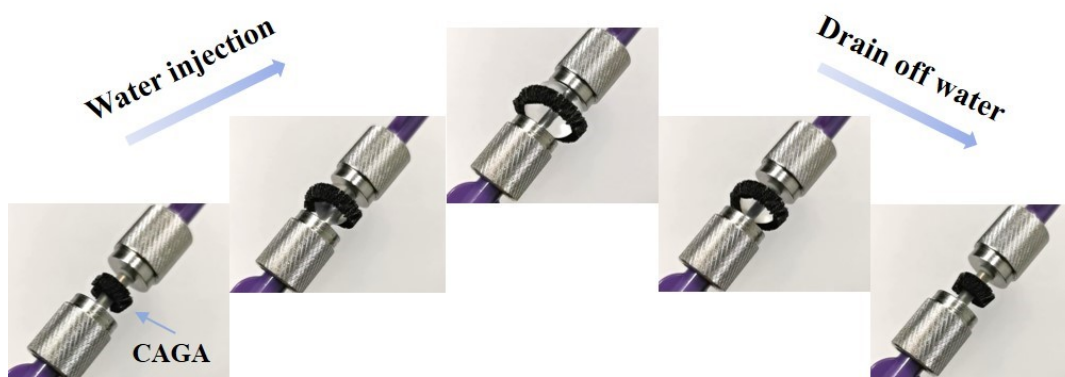

**Stretching/recovery process of CAGA ring**

**Fig. S4.** The stretching and recovery process of CAGA ring assisted by the injection device with a rubber tubing.

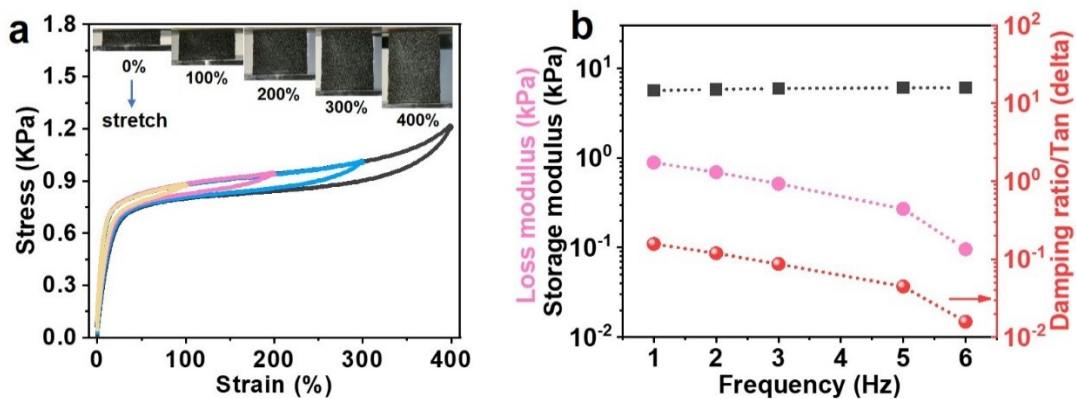

**Fig. S5.** (a) Cyclic tensile stress-strain curves of CAGA with different maximum strains and their corresponding experimental photographs. (b) Storage modulus, loss modulus and damping ratio curves of CAGA at 400 % tensile strain as function of frequency.

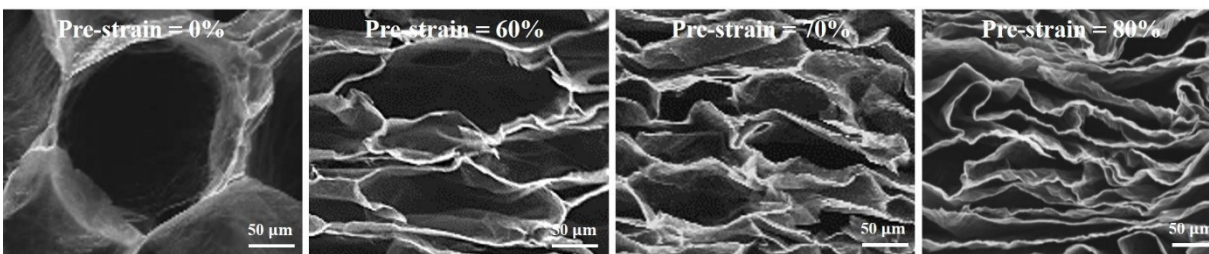

**Fig. S6.** SEM images of the CAGAs prepared by the compress-annealing at pre-strain of 0%, 60%, 70%, 80%, respectively.

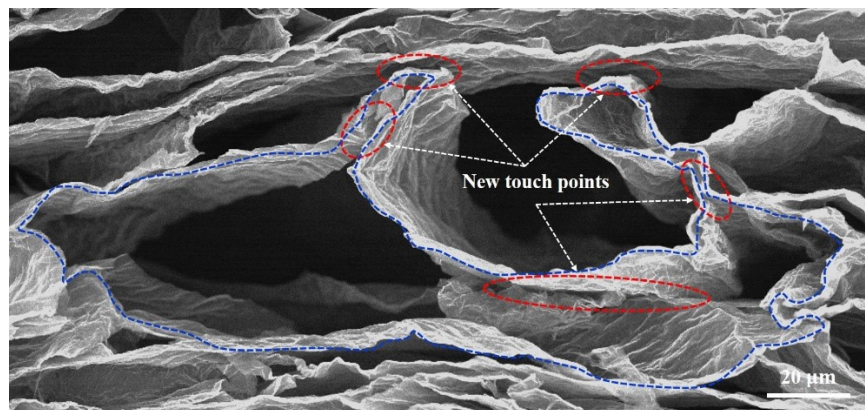

**Fig. S7.** Enlarged SEM image of the cross section of CAGA with many new touch points compared with that of PrGA.

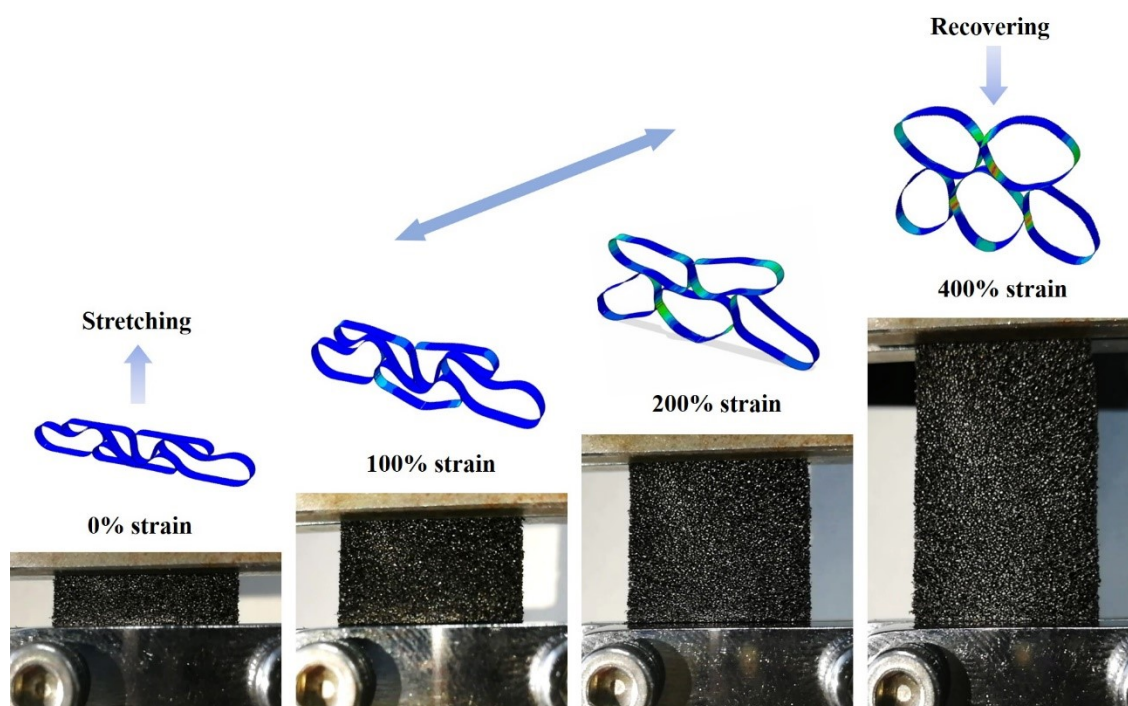

**Fig. S8.** The FE simulation and enlarged photographs of the stretching process of CAGA.

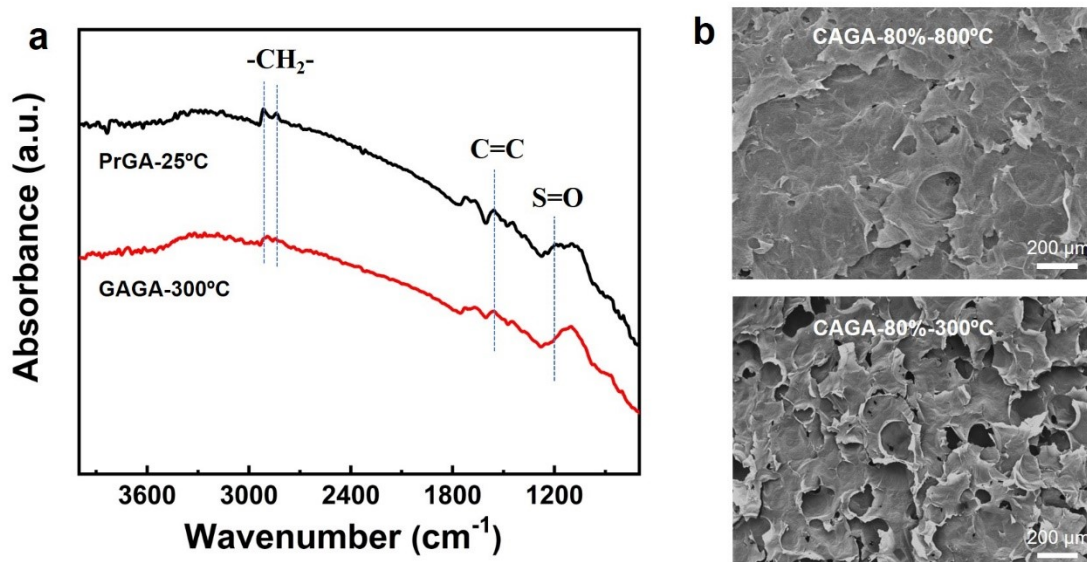

**Fig. S9.** (a) IR spectra of PrGA-25 °C and CAGA-300 °C. (b) SEM images of the fracture surfaces of CAGA-80%-800°C and CAGA-80%-300°C, respectively.

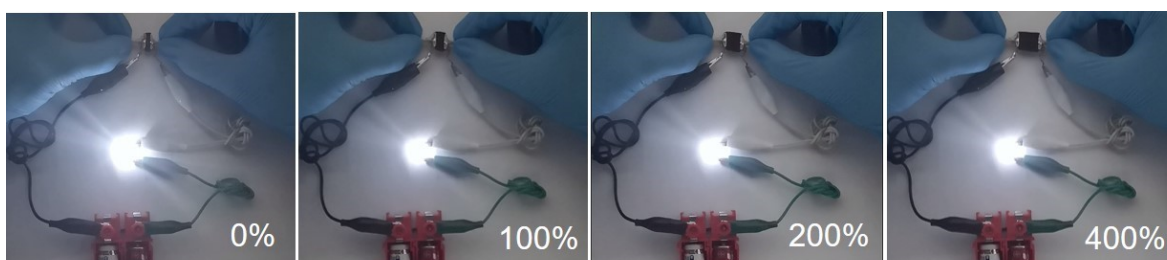

**Fig. S10.** The brightness variation of a LED lamp when the CAGA acting as an electrical conductor in closed circuit during stretching process, showing unchanged brightness from 100% to 400% tensile strain.

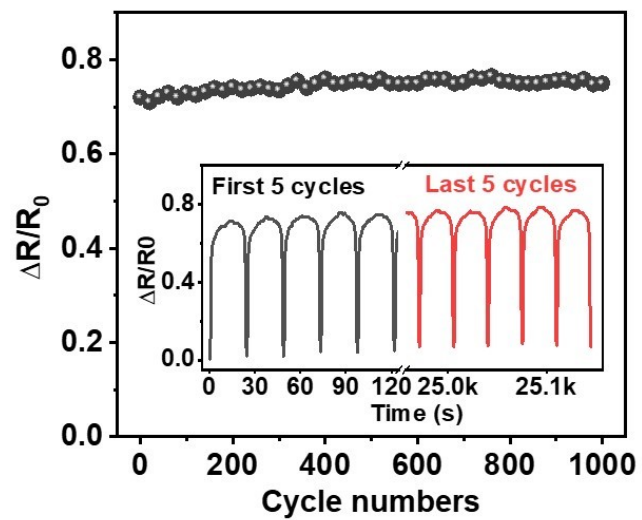

**Fig. S11.** The resistance variation rate of CAGA during long stretching-release cyclic tests for 1000 cycles at 400% strain.

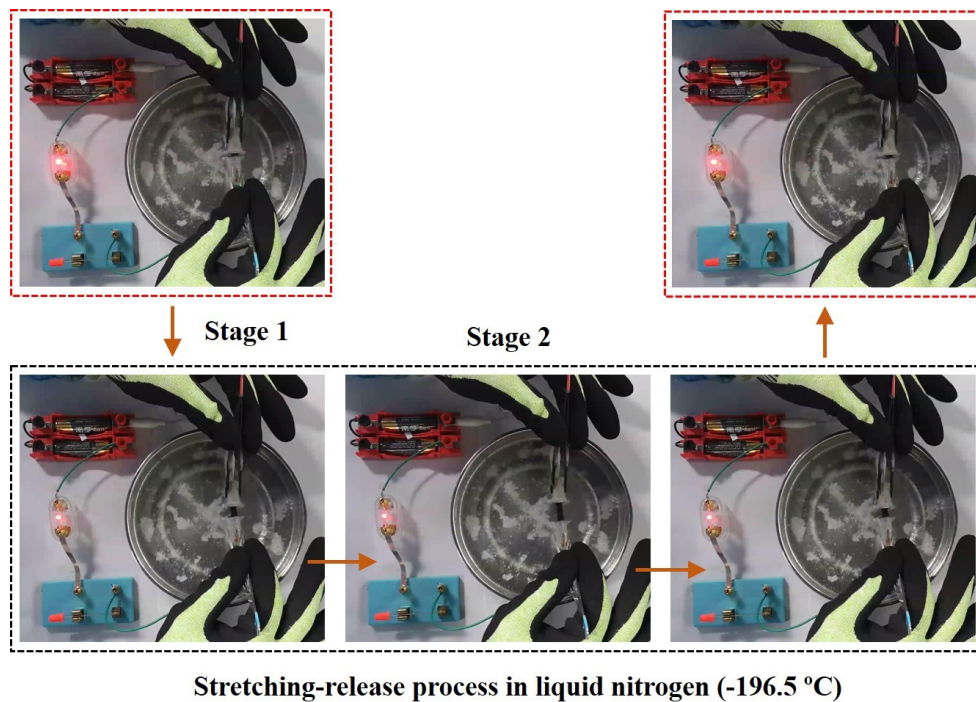

**Fig. S12.** Stretching-release tests of the CAGA as an electrical conductor in the liquid nitrogen with a temperature of -196.5 °C. The LED lamp has weakened brightness at initial deformation (stage 1) and unchanged brightness at large deformation (stage 2).
